# Supplementary material
Source: Oxford University Press journal article supplement (doi:10.1127/ejm_2015_0027-2501)
Supplement: 10.1127_ejm_2015_0027-2501_table_s1_deposited_cc.doc [file 10.1127_ejm_2015_0027-2501_table_s1_deposited_cc.doc]

**Table S1 (to be deposited).** X-ray powder diffraction data for fluor-schorl from Zschorlau (ZSCH8) and Grasstein.

| Zschorlau | |  |  |  | | | | Grasstein | |  |  |
| --- | --- | --- | --- | --- | --- | --- | --- | --- | --- | --- | --- |
| *d*meas (Å) | *d*calc (Å) | *I*meas | *I*calc | | *h* | *k* | *l* | *d*meas (Å) | *d*calc (Å) | *I*meas | *I*calc |
| 6.361 | 6.375 | **84** | 97 | | 1 | 0 | 1 | 6.382 | 6.365 | **37** | 88 |
| 4.981 | 4.984 | 19 | 21 | | 0 | 2 | 1 | 4.993 | 4.980 | 14 | 21 |
| 4.614 | 4.616 | 18 | 3 | | 0 | 3 | 0 | 4.625 | 4.617 | 9 | 2 |
| 4.225 | 4.230 | **39** | 25 | | 2 | 1 | 1 | 4.234 | 4.227 | **40** | 30 |
| 3.995 | 3.998 | **100** | 20 | | 2 | 2 | 0 | 4.005 | 3.999 | **39** | 16 |
| 3.470 | 3.475 | **67** | 100 | | 0 | 1 | 2 | 3.472 | 3.469 | **99** | 78 |
| 3.387 | 3.387 | 3 | 2 | | 1 | 3 | 1 | 3.387 | 3.386 | 4 | 2 |
| 3.192 | 3.187 | 5 | 8 | | 2 | 0 | 2 | 3.184 | 3.182 | 1 | 7 |
| 3.021 | 3.022 | 8 | 10 | | 1 | 4 | 0 | 3.024 | 3.023 | 2 | 8 |
| 2.959 | 2.961 | **51** | 34 | | 1 | 2 | 2 | 2.959 | 2.957 | **83** | 36 |
| 2.907 | 2.905 | 5 | 9 | | 3 | 2 | 1 | 2.910 | 2.905 | 9 | 10 |
| 2.624 | 2.623 | 3 | 7 | | 3 | 1 | 2 | 2.623 | 2.620 | 5 | 8 |
| 2.584 | 2.584 | **76** | 78 | | 0 | 5 | 1 | 2.585 | 2.584 | **100** | 69 |
| 2.490 | 2.492 | 2 | 37 | | 0 | 4 | 2 | 2.491 | 2.490 | 6 | 37 |
| 2.391 | 2.394 | 9 | 4 | | 0 | 0 | 3 | 2.390 | 2.389 | 19 | 3 |
| 2.379 | 2.379 | 11 | 19 | | 2 | 3 | 2 | 2.379 | 2.377 | 21 | 23 |
| 2.349 | 2.350 | 8 | 8 | | 5 | 1 | 1 | 2.351 | 2.350 | 14 | 8 |
| 2.308 | 2.308 | 2 | 7 | | 0 | 6 | 0 | 2.310 | 2.309 | 3 | 5 |
| 2.293 | 2.293 | 4 | 5 | | 1 | 1 | 3 | 2.291 | 2.289 | 2 | 4 |
| 2.217 | 2.218 | 2 | 5 | | 2 | 5 | 0 | 2.219 | 2.218 | 2 | 4 |
| 2.191 | 2.193 | 9 | 13 | | 5 | 0 | 2 | 2.192 | 2.192 | 21 | 8 |
| 2.170 | 2.170 | 6 | 19 | | 4 | 3 | 1 | 2.171 | 2.170 | 13 | 19 |
| 2.122 | 2.125 | 9 | 6 | | 0 | 3 | 3 | 2.123 | 2.122 | 24 | 11 |
| 2.115 | 2.115 | 5 | 4 | | 4 | 2 | 2 | 2.114 | 2.114 | 7 | 4 |
| 2.045 | 2.045 | **24** | 46 | | 1 | 5 | 2 | 2.044 | 2.044 | **80** | 100 |
| 2.026 | 2.026 | 5 | 17 | | 1 | 6 | 1 | 2.027 | 2.026 | 12 | 16 |
| 2.000 | 1.999 | 3 | 11 | | 4 | 4 | 0 | 2.000 | 1.999 | 5 | 9 |
| 1.923 | 1.923 | 14 | 24 | | 3 | 4 | 2 | 1.920 | 1.922 | 29 | 28 |
| 1.907 | 1.907 | 3 | 7 | | 3 | 5 | 1 | 1.908 | 1.908 | 5 | 7 |
| 1.875 | 1.876 | 6 | 30 | | 1 | 4 | 3 | 1.875 | 1.874 | 18 | 33 |
| 1.856 | 1.855 | 3 | 5 | | 6 | 2 | 1 | 1.856 | 1.855 | 10 | 5 |
| 1.836 | 1.834 | 2 | 1 | | 1 | 7 | 0 | 1.835 | 1.835 | 3 | 2 |
| 1.819 | 1.820 | 5 | 5 | | 6 | 1 | 2 | 1.820 | 1.820 | 2 | 5 |
| 1.779 | 1.781 | 3 | 10 | | 3 | 3 | 3 | 1.779 | 1.779 | 10 | 6 |
| 1.734 | 1.733 | 2 | 7 | | 5 | 3 | 2 | 1.734 | 1.732 | 8 | 8 |
| 1.721 | 1.721 | 1 | 9 | | 5 | 4 | 1 | 1.722 | 1.722 | 4 | 9 |
| 1.694 | 1.693 | 1 | 4 | | 2 | 6 | 2 | 1.693 | 1.693 | 5 | 2 |
| 1.660 | 1.661 | 10 | 24 | | 0 | 6 | 3 | 1.660 | 1.660 | 25 | 12 |
| 1.647 | 1.647 | 6 | 7 | | 2 | 7 | 1 | 1.647 | 1.647 | 19 | 7 |
| 1.626 | 1.627 | <1 | 6 | | 2 | 5 | 3 | 1.625 | 1.625 | 2 | 7 |
| 1.600 | 1.599 | 14 | 23 | | 5 | 5 | 0 | 1.600 | 1.600 | 25 | 11 |
| 1.591 | 1.594 | 3 | 7 | | 4 | 0 | 4 | 1.592 | 1.591 | 14 | 12 |
| 1.581 | 1.581 | 1 | 1 | | 8 | 1 | 1 | 1.581 | 1.581 | 2 | 1 |
| 1.562 | 1.563 | 1 | 2 | | 3 | 2 | 4 | 1.561 | 1.561 | 5 | 5 |
| 1.551 | 1.551 | 2 | 13 | | 4 | 6 | 1 | 1.552 | 1.551 | 6 | 13 |
| 1.539 | 1.539 | 2 | 2 | | 0 | 9 | 0 | 1.540 | 1.539 | 6 | 1 |
| 1.531 | 1.530 | 1 | 3 | | 7 | 2 | 2 | 1.530 | 1.530 | 7 | 3 |
| 1.523 | 1.523 | 1 | 8 | | 7 | 3 | 1 | 1.523 | 1.523 | 3 | 8 |
| 1.506 | 1.506 | 6 | 26 | | 0 | 5 | 4 | 1.505 | 1.504 | 28 | 25 |
| 1.480 | 1.480 | 1 | 7 | | 2 | 4 | 4 | 1.479 | 1.478 | 9 | 5 |
| 1.454 | 1.456 | **26** | 27 | | 5 | 1 | 4 | 1.454 | 1.454 | **36** | 28 |
| 1.436 | 1.436 | 2 | 4 | | 4 | 7 | 0 | 1.437 | 1.436 | 7 | 3 |
| 1.428 | 1.428 | 9 | 10 | | 0 | 1 | 5 | 1.426 | 1.426 | 16 | 7 |
| 1.422 | 1.423 | 4 | 24 | | 6 | 5 | 1 | 1.423 | 1.423 | 13 | 10 |
| 1.410 | 1.410 | 6 | 11 | | 4 | 3 | 4 | 1.408 | 1.408 | 30 | 13 |
| 1.408 | 1.406 | 5 | 1 | | 2 | 0 | 5 | 1.403 | 1.403 | <1 | 1 |
| 1.380 | 1.380 | 5 | 3 | | 3 | 8 | 1 | 1.380 | 1.380 | 2 | 3 |
| 1.359 | 1.360 | 4 | 17 | | 10 | 0 | 1 | 1.358 | 1.360 | 16 | 13 |
| 1.346 | 1.346 | 2 | 8 | | 5 | 6 | 2 | 1.346 | 1.346 | 8 | 9 |
| 1.333 | 1.333 | 3 | 7 | | 6 | 6 | 0 | 1.334 | 1.333 | 7 | 3 |
| 1.329 | 1.330 | 3 | 9 | | 5 | 5 | 3 | 1.329 | 1.329 | 15 | 10 |
| 1.327 | 1.327 | 2 | 1 | | 0 | 4 | 5 | 1.325 | 1.324 | 7 | 1 |
| 1.314 | 1.314 | 3 | 4 | | 1 | 10 | 0 | 1.315 | 1.315 | 14 | 1 |
| 1.309 | 1.309 | 4 | 3 | | 2 | 3 | 5 | 1.307 | 1.306 | 7 | 5 |
| 1.304 | 1.304 | 6 | 6 | | 5 | 7 | 1 | 1.304 | 1.305 | 7 | 6 |
| 1.295 | 1.294 | 4 | 5 | | 9 | 0 | 3 | 1.293 | 1.294 | 4 | 4 |
| 1.288 | 1.287 | 1 | 1 | | 8 | 4 | 1 | 1.288 | 1.288 | 3 | 1 |
| 1.281 | 1.280 | 3 | 1 | | 3 | 9 | 0 | 1.281 | 1.281 | 7 | 1 |
| 1.278 | 1.278 | 4 | 3 | | 2 | 8 | 3 | 1.278 | 1.277 | 8 | 4 |
| 1.274 | 1.275 | 5 | 12 | | 5 | 0 | 5 | 1.273 | 1.273 | 32 | 21 |
| 1.261 | 1.262 | 4 | 2 | | 5 | 4 | 4 | 1.260 | 1.260 | 5 | 2 |
| 1.240 | 1.240 | 2 | 6 | | 0 | 11 | 1 | 1.240 | 1.240 | 6 | 5 |
| 1.230 | 1.231 | 2 | 4 | | 4 | 7 | 3 | 1.231 | 1.231 | 6 | 5 |
| 1.225 | 1.225 | 3 | 2 | | 2 | 10 | 1 | 1.226 | 1.226 | 3 | 2 |
| 1.214 | 1.215 | 1 | 3 | | 3 | 4 | 5 | 1.213 | 1.213 | 5 | 4 |
| 1.201 | 1.203 | 3 | 2 | | 8 | 1 | 4 | 1.202 | 1.202 | 2 | 2 |
| 1.197 | 1.197 | 6 | 6 | | 0 | 0 | 6 | 1.195 | 1.194 | 4 | 4 |
| 1.185 | 1.184 | 3 | 9 | | 11 | 1 | 1 | 1.184 | 1.185 | 7 | 8 |
| 1.181 | 1.177 | 2 | 2 | | 7 | 3 | 4 | 1.176 | 1.176 | 2 | 2 |
| 1.160 | 1.158 | 3 | 2 | | 3 | 0 | 6 | 1.156 | 1.156 | 6 | 1 |
| 1.154 | 1.152 | 14 | 17 | | 10 | 1 | 3 | 1.152 | 1.152 | 11 | 17 |
| 1.140 | 1.139 | 4 | 4 | | 1 | 11 | 2 | 1.139 | 1.139 | 3 | 3 |
| 1.129 | 1.129 | 1 | 5 | | 1 | 9 | 4 | 1.129 | 1.128 | 7 | 5 |
| 1.112 | 1.113 | 1 | 4 | | 1 | 4 | 6 | 1.109 | 1.111 | 5 | 4 |
| 1.107 | 1.107 | 1 | 1 | | 3 | 8 | 4 | 1.106 | 1.106 | 2 | 1 |
| 1.096 | 1.097 | 1 | 3 | | 10 | 0 | 4 | 1.096 | 1.096 | 4 | 3 |
| 1.092 | 1.092 | <1 | 1 | | 3 | 3 | 6 | 1.090 | 1.090 | 2 | 1 |
| 1.083 | 1.085 | 2 | 3 | | 8 | 6 | 2 | 1.085 | 1.085 | 4 | 4 |
| 1.075 | 1.075 | 1 | 3 | | 5 | 9 | 2 | 1.073 | 1.075 | 1 | 3 |
| 1.063 | 1.065 | 2 | 2 | | 6 | 4 | 5 | 1.064 | 1.064 | 3 | 3 |
| 1.062 | 1.062 | 3 | 4 | | 0 | 6 | 6 | 1.061 | 1.061 | 6 | 4 |
| 1.045 | 1.045 | 1 | 1 | | 12 | 2 | 1 | 1.045 | 1.045 | 1 | 1 |
| 1.035 | 1.036 | 1 | 5 | | 5 | 10 | 1 | 1.036 | 1.036 | 3 | 2 |
| 1.031 | 1.031 | 1 | 2 | | 7 | 7 | 3 | 1.031 | 1.031 | 9 | 2 |
| 1.020 | 1.021 | 2 | 10 | | 5 | 6 | 5 | 1.020 | 1.020 | 13 | 11 |
| 1.014 | 1.014 | 1 | 1 | | 7 | 6 | 4 | 1.013 | 1.014 | 3 | 1 |
| 1.006 | 1.006 | <1 | 3 | | 4 | 10 | 3 | 1.006 | 1.006 | 3 | 3 |
| 0.999 | 0.998 | <1 | 1 | | 4 | 9 | 4 | 0.998 | 0.998 | 1 | 2 |
| 0.997 | 0.997 | 2 | 2 | | 0 | 10 | 5 | 0.996 | 0.996 | 3 | 3 |
| 0.989 | 0.989 | 2 | 3 | | 2 | 9 | 5 | 0.988 | 0.988 | 3 | 4 |
| 0.980 | 0.980 | <1 | 2 | | 10 | 6 | 1 | 0.980 | 0.980 | 2 | 2 |
| 0.973 | 0.974 | <1 | 2 | | 7 | 5 | 5 | 0.974 | 0.974 | 2 | 5 |
| 0.969 | 0.968 | 1 | 5 | | 6 | 9 | 3 | 0.968 | 0.968 | 4 | 6 |
| 0.960 | 0.960 | 3 | 2 | | 9 | 7 | 2 | 0.960 | 0.961 | 5 | 2 |
| 0.959 | 0.958 | 8 | 9 | | 5 | 5 | 6 | 0.957 | 0.957 | 6 | 10 |
| 0.948 | 0.948 | 1 | 7 | | 5 | 1 | 7 | 0.947 | 0.947 | 5 | 6 |
| 0.945 | 0.945 | 1 | 1 | | 9 | 0 | 6 | 0.943 | 0.944 | 2 | 1 |
| 0.938 | 0.938 | 1 | 2 | | 2 | 8 | 6 | 0.937 | 0.937 | 1 | 2 |
| 0.935 | 0.935 | 1 | 1 | | 4 | 3 | 7 | 0.934 | 0.934 | 3 | 1 |
| 0.932 | 0.932 | <1 | 2 | | 13 | 3 | 1 | 0.932 | 0.932 | 4 | 1 |
| 0.928 | 0.928 | 2 | 4 | | 12 | 4 | 2 | 0.928 | 0.928 | 3 | 2 |
| 0.923 | 0.923 | 1 | 2 | | 0 | 15 | 0 | 0.924 | 0.924 | 3 | 1 |
| 0.919 | 0.919 | 2 | 4 | | 7 | 4 | 6 | 0.918 | 0.918 | 5 | 4 |
| 0.910 | 0.909 | 1 | 3 | | 3 | 10 | 5 | 0.909 | 0.909 | 5 | 3 |
| 0.905 | 0.904 | <1 | 6 | | 5 | 11 | 3 | 0.904 | 0.904 | 6 | 7 |
| 0.899 | 0.898 | <1 | 2 | | 11 | 6 | 2 | 0.898 | 0.898 | 1 | 2 |
| 0.892 | 0.893 | <1 | 4 | | 11 | 4 | 4 | 0.893 | 0.893 | 3 | 4 |
| 0.890 | 0.890 | 1 | 4 | | 6 | 6 | 6 | 0.890 | 0.890 | 2 | 2 |
| 0.885 | 0.885 | 1 | 9 | | 1 | 10 | 6 | 0.884 | 0.884 | 3 | 10 |
| 0.873 | 0.874 | <1 | 1 | | 3 | 9 | 6 | 0.871 | 0.873 | 3 | 1 |
| 0.866 | 0.866 | 1 | 9 | | 10 | 6 | 4 | 0.866 | 0.866 | 7 | 10 |
| 0.859 | 0.859 | 1 | 1 | | 16 | 0 | 1 | 0.859 | 0.860 | 3 | 2 |
| 0.856 | 0.857 | 1 | 3 | | 7 | 3 | 7 | 0.856 | 0.856 | 4 | 4 |
| 0.846 | 0.846 | 7 | 12 | | 10 | 5 | 5 | 0.846 | 0.846 | 7 | 14 |
| 0.844 | 0.844 | 4 | 7 | | 1 | 5 | 8 | 0.843 | 0.843 | 3 | 6 |
| 0.838 | 0.838 | 1 | 3 | | 1 | 16 | 0 | 0.838 | 0.838 | 3 | 2 |
| 0.838 | 0.838 | 4 | 11 | | 6 | 5 | 7 | 0.837 | 0.837 | 4 | 13 |
| 0.833 | 0.833 | 2 | 2 | | 9 | 9 | 3 | 0.833 | 0.833 | 4 | 2 |
| 0.829 | 0.829 | 1 | 1 | | 3 | 8 | 7 | 0.828 | 0.828 | 2 | 1 |
| 0.826 | 0.826 | 2 | 3 | | 2 | 11 | 6 | 0.826 | 0.826 | 3 | 1 |
| 0.824 | 0.824 | 2 | 2 | | 10 | 0 | 7 | 0.823 | 0.823 | 2 | 1 |

Notes: Automated X-ray powder diffractometer; Cu*K*a1 radiation (l = 1.54056 Å); standards: quartz (internal) for Zschorlau; Si (SRM640c) for Grasstein. Indexing based on crystal-structure refinement; only reflections with *I*calc  1 are listed. The eight strongest reflections are in bold.
